# Supplementary material for: Synthesis, structures, and electrochromic behaviors of poly(triarylamine)s based on 3-substituted thiophene derivatives
Source: Royal Society of Chemistry journal article supplement (doi:10.1039/c4ra16079g), 2015-01-01
Supplement: c4ra16079g1.pdf [file c4ra16079g1.pdf]

*Supporting Information*

## **Synthesis, Structures, and Electrochromic Behaviors of Poly(triarylamine)s base on 3-substituted Thiophene Derivatives**

Jinrui Lin and Xiuyuan Ni \*

State Key Laboratory of Molecular Engineering of Polymer, Department of Macromolecular Science, Fudan University, Shanghai, 200433, The People's Republic of China, E-mail: xyni@fudan.edu.cn

### **Table of Contents**

|                                                                                                                   |           |
|-------------------------------------------------------------------------------------------------------------------|-----------|
| Table S1. Optical and electrochemical data collected for coloration efficiency measurements of P3PAT and P3PTT .. | <b>S2</b> |
| Figure S1. FTIR spectra of 3PAT, P3PAT, 3PTT and P3PTT .....                                                      | <b>S2</b> |
| Figure S2. TGA curves of P3PAT and P3PTT .....                                                                    | <b>S3</b> |
| Figure S3. <sup>1</sup> H NMR spectrum of (a) 3PAT and (b) 3PTT in CDCl <sub>3</sub> . .....                      | <b>S3</b> |

Table S1. Optical and electrochemical data collected for coloration efficiency measurements of P3PAT and P3PTT

| Cycling times <sup>a</sup> | $\delta OD_{780}^b$<br>P3PAT | $\delta OD_{350}^b$<br>P3PAT | $\delta OD_{512}^b$<br>P3PTT | $\delta OD_{780}^b$<br>P3PTT | Q(mC/cm <sup>2</sup> ) <sup>c</sup><br>P3PAT | Q(mC/cm <sup>2</sup> ) <sup>c</sup><br>P3PTT | $\eta$ (cm <sup>2</sup> /C) <sup>d</sup><br>P3PAT | $\eta$ (cm <sup>2</sup> /C) <sup>d</sup><br>P3PTT | decay(%) <sup>e</sup><br>P3PAT | decay(%) <sup>e</sup><br>P3PTT |
|----------------------------|------------------------------|------------------------------|------------------------------|------------------------------|----------------------------------------------|----------------------------------------------|---------------------------------------------------|---------------------------------------------------|--------------------------------|--------------------------------|
| 5                          | 0.220                        | 0.066                        | 0.149                        | 0.080                        | 1.095                                        | 1.053                                        | 201                                               | 142                                               | 0                              | 0                              |
| 10                         | 0.220                        | 0.063                        | 0.133                        | 0.082                        | 1.095                                        | 0.988                                        | 201                                               | 135                                               | 0                              | 4.93                           |
| 15                         | 0.225                        | 0.061                        | 0.130                        | 0.080                        | 1.119                                        | 0.983                                        | 201                                               | 132                                               | 0                              | 7.05                           |
| 20                         | 0.225                        | 0.058                        | 0.130                        | 0.079                        | 1.119                                        | 0.981                                        | 201                                               | 132                                               | 0                              | 7.05                           |
| 25                         | 0.218                        | 0.058                        | 0.128                        | 0.078                        | 1.118                                        | 0.969                                        | 195                                               | 132                                               | 2.99                           | 7.05                           |
| 30                         | 0.215                        | 0.056                        | 0.127                        | 0.078                        | 1.114                                        | 0.962                                        | 193                                               | 132                                               | 3.99                           | 7.05                           |
| 35                         | 0.208                        | 0.054                        | 0.127                        | 0.077                        | 1.095                                        | 0.960                                        | 190                                               | 132                                               | 5.47                           | 7.05                           |
| 40                         | 0.197                        | 0.053                        | 0.125                        | 0.076                        | 1.042                                        | 0.951                                        | 189                                               | 131                                               | 5.47                           | 7.75                           |
| 45                         | 0.183                        | 0.052                        | 0.123                        | 0.075                        | 0.984                                        | 0.937                                        | 186                                               | 131                                               | 7.46                           | 7.75                           |
| 50                         | 0.165                        | 0.051                        | 0.122                        | 0.074                        | 0.932                                        | 0.931                                        | 177                                               | 131                                               | 9.95                           | 7.75                           |

<sup>a</sup> Switching between 0 and 1.35 V for P3PAT, 0 and 1.00 V for P3PTT (V vs Ag/AgCl).

<sup>b</sup> Optical density change at the given wavelength.

<sup>c</sup> Ejected charge, determined from the in situ experiments.

<sup>d</sup> Coloration efficiency is derived from the equation  $\eta = \delta OD/Q$ .

<sup>e</sup> Decay of coloration efficiency after cyclic scans.

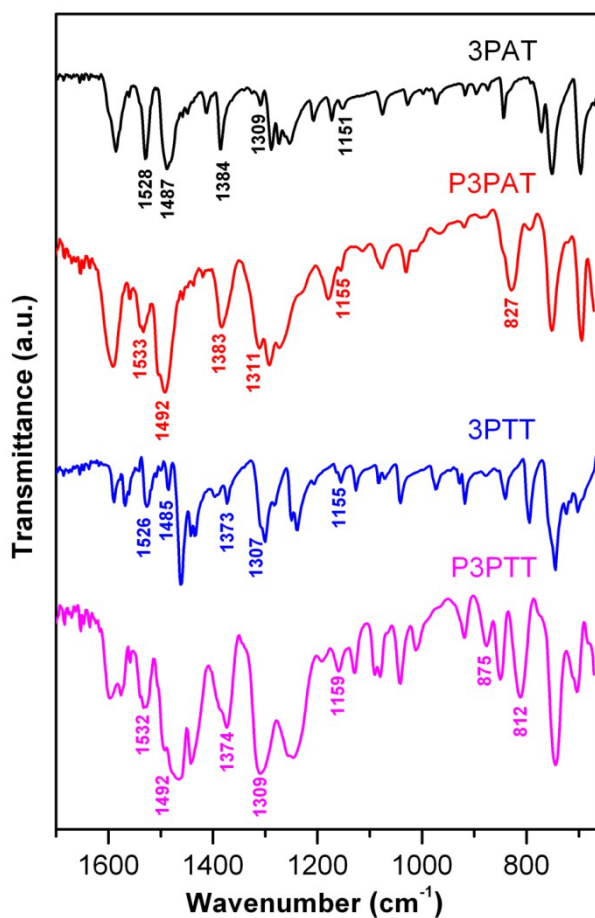

Figure S1. FTIR spectra of 3PAT, P3PAT, 3PTT and P3PTT.

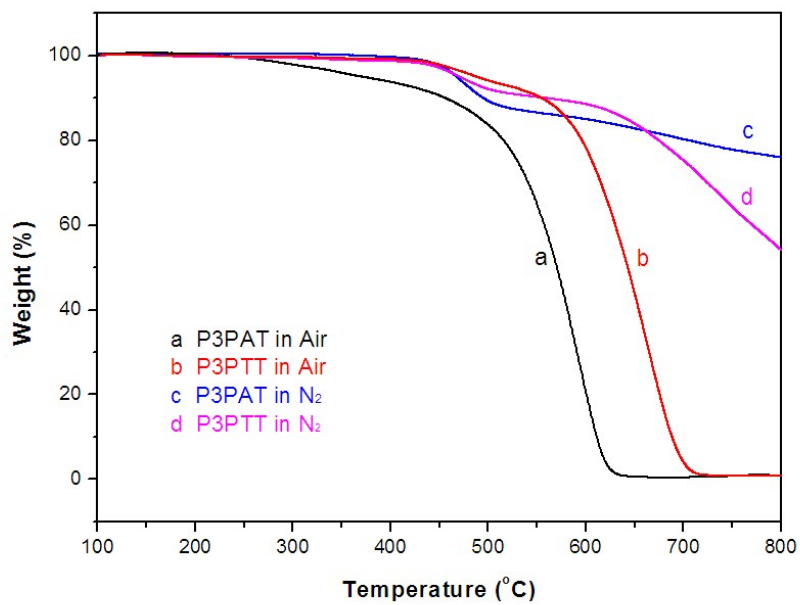

Figure S2. TGA curves of P3PAT and P3PTT.

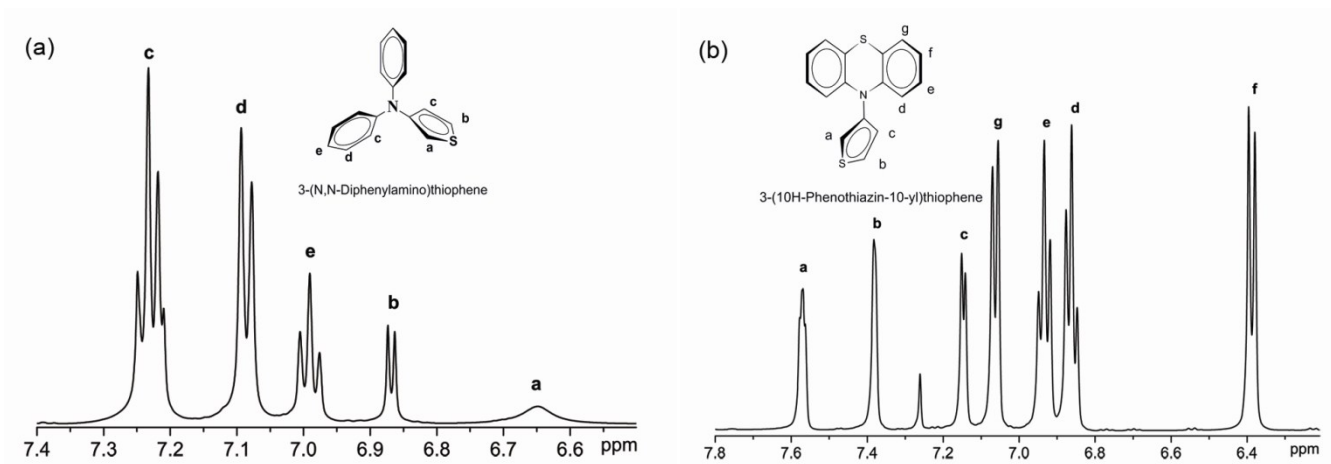

Figure S3. <sup>1</sup>H NMR spectrum of (a) 3PAT and (b) 3PTT in CDCl<sub>3</sub>.
